# Supplementary material
Source: PubMed Central journal article supplement (PMC5327697)
Supplement: NIHMS831007-supplement-Supplementary_Table_1.pdf [file NIHMS831007-supplement-Supplementary_Table_1.pdf]

**Supplementary Table 1.** Complete blood count in 8 week old WT and S534A mice (n=5 per group).

|                                   | <b>WT</b>       | <b>S534A</b>     |
|-----------------------------------|-----------------|------------------|
| WBC ( $\times 10^3/\mu\text{L}$ ) | 2.628 $\pm$ 1.0 | 3.156 $\pm$ 0.9  |
| NE (%)                            | 27.2 $\pm$ 8.5  | 18.8 $\pm$ 4.8   |
| LY (%)                            | 67.8 $\pm$ 9.01 | 76.2 $\pm$ 6.8   |
| MO (%)                            | 4.4 $\pm$ 0.5   | 3.8 $\pm$ 2.4    |
| EO (%)                            | 0.4 $\pm$ 0.8   | 0.6 $\pm$ 1.2    |
| BA (%)                            | 0.2 $\pm$ 0.4   | 0.6 $\pm$ 0.8    |
| HCT (%)                           | 35.02 $\pm$ 1.8 | 36.86 $\pm$ 5.6  |
| RBC ( $\times 10^6/\mu\text{L}$ ) | 6.894 $\pm$ 0.2 | 6.91 $\pm$ 0.8   |
| HB                                | 11.1 $\pm$ 0.2  | 11.38 $\pm$ 1.6  |
| MCV (fL)                          | 50.82 $\pm$ 2.4 | 53.22 $\pm$ 4.0  |
| MCH (pg)                          | 16.1 $\pm$ 0.3  | 16.44 $\pm$ 0.4  |
| MCHC (g/dL)                       | 31.76 $\pm$ 1.6 | 30.98 $\pm$ 2.0  |
| RDW (%)                           | 12.48 $\pm$ 0.6 | 13.06 $\pm$ 0.6  |
| RSD (fL)                          | 6.36 $\pm$ 0.6  | 6.94 $\pm$ 0.6   |
| RETIC (K/ $\mu\text{L}$ )         | 23.24 $\pm$ 9.2 | 37.26 $\pm$ 39.5 |
| RETIC (%)                         | 0.34 $\pm$ 0.1  | 0.524 $\pm$ 0.5  |
| PLT ( $\times 10^3/\mu\text{L}$ ) | 772 $\pm$ 195.2 | 791.8 $\pm$ 91.3 |
