# Supplementary material
Source: PubMed Central journal article supplement (PMC5327697)
Supplement: NIHMS831007-supplement-Supplementary_Table_3.pdf [file NIHMS831007-supplement-Supplementary_Table_3.pdf]

change (logFC ratio) of all Affymetrix 1.0ST probes in livers of adult S534A vs WT mice (n=4 per genotype) 4 hours after intravenous injection of LPS at a dose of 1 mg/kg.

| Affymetrix ID | Symbol    | Description                                                                 | logFC (S534A vs WT) | AveExpr     | t        | adj.P.Value (FDR) | B       |
|---------------|-----------|-----------------------------------------------------------------------------|---------------------|-------------|----------|-------------------|---------|
| 10377429      | Snord118  | small nucleolar RNA, C                                                      | 1.586196057         | 8.755564029 | 3.38288  | 0.999969168       | -2.7014 |
| 10399428      | Snord118  | small nucleolar RNA, C                                                      | 1.586196057         | 8.755564029 | 3.38288  | 0.999969168       | -2.7014 |
| 10598071      |           |                                                                             | 1.149694825         | 5.179356075 | 4.300111 | 0.999969168       | -1.9227 |
| 10598064      |           |                                                                             | 0.985895305         | 7.598467427 | 5.03277  | 0.999969168       | -2.5933 |
| 10598075      |           |                                                                             | 0.962752881         | 9.822907006 | 3.060556 | 0.999969168       | -2.9972 |
| 10456771      |           |                                                                             | 0.897548582         | 8.889784357 | 2.341811 | 0.999969168       | -3.6717 |
| 10347218      | Fst       | folistatin                                                                  | 0.886728945         | 10.17128967 | 1.837386 | 0.999969168       | -4.1225 |
| 10412260      | Slc15a2   | solute carrier fam15 (H+)                                                   | 0.883149547         | 8.128896798 | 1.589397 | 0.999969168       | -4.3308 |
| 10439321      |           |                                                                             | 0.881440491         | 6.652761367 | 1.96598  | 0.999969168       | -4.013  |
| 10455959      |           |                                                                             | 0.87818684          | 6.701171689 | 1.451104 | 0.999969168       | -4.4381 |
| 10563110      | Snord34   | small nucleolar RNA, C                                                      | 0.819114486         | 8.598615246 | 3.373101 | 0.999969168       | -2.7107 |
| 10404595      | Pod13a    | protein phosphatase 1, regulatory (inhibitor) subunit 3G                    | 0.768939669         | 8.158804015 | 1.449193 | 0.999969168       | -4.4395 |
| 10338684      |           |                                                                             | 0.76570697          | 6.658997533 | 1.846235 | 0.999969168       | -4.1174 |
| 10344386      |           |                                                                             | 0.757893143         | 5.268650775 | 2.712773 | 0.999969168       | -3.2322 |
| 10393136      | Fbf1      | Fas (TNFRSF6) binding factor 1                                              | 0.714548546         | 7.965225156 | 2.297006 | 0.999969168       | -3.7127 |
| 10598018      |           |                                                                             | 0.709868493         | 8.349991063 | 4.075268 | 0.999969168       | -2.1037 |
| 10598062      |           |                                                                             | 0.70985842          | 9.925082813 | 2.937767 | 0.999969168       | -3.1118 |
| 10340864      |           |                                                                             | 0.709105027         | 9.97078882  | 2.084123 | 0.999969168       | -3.9075 |
| 10343609      |           |                                                                             | 0.692855174         | 5.15196716  | 1.398505 | 0.999969168       | -4.4773 |
| 10598077      |           |                                                                             | 0.679362419         | 6.979789636 | 1.833161 | 0.999969168       | -4.1287 |
| 10585037      | Rud13     | RUD13 homologue (yeast)                                                     | 0.655267444         | 8.138191691 | 2.506746 | 0.999969168       | -3.517  |
| 10449741      | Slk1      | salt inducible kinase 1                                                     | 0.651912454         | 9.370376334 | 1.717419 | 0.999969168       | -4.2265 |
| 10563112      | Snord33   | small nucleolar RNA, C                                                      | 0.648929222         | 7.334540901 | 2.691616 | 0.999969168       | -3.3432 |
| 10444778      |           |                                                                             | 0.648426527         | 7.969067665 | 5.47769  | 0.999969168       | -2.5537 |
| 10598041      |           |                                                                             | 0.647214621         | 10.70616218 | 1.832449 | 0.999969168       | -4.1293 |
| 10576216      | Snord68   | small nucleolar RNA, C                                                      | 0.645719624         | 6.378451905 | 2.831143 | 0.999969168       | -3.21   |
| 10530259      | 9130230Lc | RIKEN cDNA 9130230Lc2 gene                                                  | 0.637172758         | 5.964624449 | 4.836625 | 0.999969168       | -1.5221 |
| 10598079      |           |                                                                             | 0.632970456         | 5.386549367 | 1.464146 | 0.999969168       | -4.4282 |
| 10344407      |           |                                                                             | 0.626034647         | 5.341554377 | 2.51869  | 0.999969168       | -3.5058 |
| 10501922      | Shna8     | small nucleolar RNA host gene 8                                             | 0.617648142         | 7.254469433 | 2.664871 | 0.999969168       | -3.3683 |
| 10454030      | Cahv      | calcium-binding tyrosine-(Y)-phosphorylation regulated (fibrous sheathin 2) | 0.610258595         | 8.008386315 | 1.908771 | 0.999969168       | -4.0637 |
| 10343442      |           |                                                                             | 0.609976849         | 6.269409379 | 1.951752 | 0.999969168       | -4.0255 |
| 10508723      | Snora61   | small nucleolar RNA, H                                                      | 0.606354338         | 5.103560546 | 5.844424 | 0.999969168       | -2.5213 |
| 10344262      |           |                                                                             | 0.606032644         | 5.58570938  | 3.316756 | 0.999969168       | -2.7614 |
| 10344457      |           |                                                                             | 0.604991287         | 4.961168195 | 2.305194 | 0.999969168       | -3.7051 |
| 10445251      | Gnr110    | G protein-coupled receptor 110                                              | 0.604574927         | 9.087127276 | 2.10579  | 0.999969168       | -3.8879 |
| 10479902      | Dhtk1     | dehydrogenase E1 and transketolase domain containing 1                      | 0.591227845         | 9.837473622 | 1.77895  | 0.999969168       | -4.1749 |
| 10340868      |           |                                                                             | 0.589690041         | 5.215320371 | 1.799238 | 0.999969168       | -4.3376 |
| 10339972      |           |                                                                             | 0.588322887         | 6.300030535 | 3.809493 | 0.999969168       | -2.3257 |
| 10339900      |           |                                                                             | 0.578814197         | 4.666600543 | 1.306076 | 0.999969168       | -4.5439 |
| 10347222      | Snord82   | small nucleolar RNA, C                                                      | 0.572986062         | 11.08784404 | 2.875377 | 0.999969168       | -3.1703 |
| 10536333      | Snord32a  | small nucleolar RNA, C                                                      | 0.568779176         | 10.36671789 | 3.218604 | 0.999969168       | -2.8511 |
| 10563114      |           |                                                                             | 0.5685112           | 6.67112086  | 3.917634 | 0.999969168       | -2.2284 |
| 10409276      |           |                                                                             | 0.564071663         | 6.663409642 | 1.782154 | 0.999969168       | -4.1721 |
| 10442493      |           |                                                                             | 0.563878484         | 6.413020299 | 1.830904 | 0.999969168       | -4.1306 |
| 10347143      | B930036N  | RIKEN cDNA B930036N10 gene                                                  | 0.550933314         | 6.311936741 | 2.437304 | 0.999969168       | -3.5821 |
| 10360145      | Snora74a  | small nucleolar RNA, H                                                      | 0.550810471         | 5.114146147 | 1.782932 | 0.999969168       | -4.163  |
| 10548007      |           |                                                                             | 0.54841345          | 4.78697629  | 2.484689 | 0.999969168       | -3.5377 |
| 10598073      |           |                                                                             | 0.547319021         | 10.67469338 | 3.78087  | 0.999969168       | -3.6374 |
| 10368277      | Ros12     | ribosomal protein S12                                                       | 0.537476807         | 7.055436169 | 2.632459 | 0.999969168       | -3.3989 |
| 10499130      | Rnu173b   | 173R small nuclear RNA                                                      | 0.531612598         | 8.420150492 | 1.645379 | 0.999969168       | -4.2857 |
| 10344473      |           |                                                                             | 0.529500213         | 6.286448289 | 1.376645 | 0.999969168       | -4.4933 |
| 10545130      | Gadd45a   | growth arrest and DNA-damage-inducible 45 alpha                             | 0.528681574         | 7.761071313 | 3.254479 | 0.999969168       | -2.937  |
| 10340193      |           |                                                                             | 0.524389121         | 10.29097922 | 2.533707 | 0.999969168       | -3.4917 |
| 10563108      | Snord35a  | small nucleolar RNA, C                                                      | 0.524170211         | 9.266119169 | 2.914193 | 0.999969168       | -3.1339 |
| 10459777      | lino      | linase, endothelial                                                         | 0.524132703         | 8.224380739 | 1.089091 | 0.999969168       | -4.687  |
| 10508721      | Snora44   | small nucleolar RNA, H                                                      | 0.522077164         | 5.733534559 | 5.99795  | 0.999969168       | -4.3224 |
| 10373610      | Olfir76   | olfactory receptor 767                                                      | 0.51575711          | 8.846518865 | 0.990926 | 0.999969168       | -4.7452 |
| 10342194      |           |                                                                             | 0.510430995         | 5.27732521  | 4.96079  | 0.999969168       | -2.5997 |
| 10506301      | Leor      | leptin receptor                                                             | 0.506739759         | 6.298870522 | 1.122808 | 0.999969168       | -4.6661 |
| 10347220      |           |                                                                             | 0.50333184          | 11.02713488 | 2.622282 | 0.999969168       | -3.4084 |
| 10347224      |           |                                                                             | 0.50333184          | 11.02213488 | 2.622282 | 0.999969168       | -3.4084 |
| 10379650      |           |                                                                             | 0.50333184          | 11.02213488 | 2.622282 | 0.999969168       | -3.4084 |
| 10576971      | Slfn3     | schlafen 3                                                                  | 0.50225294          | 9.040085684 | 1.978064 | 0.999969168       | -4.0023 |
| 10462359      | Irs2      | insulin receptor substrate 2                                                | 0.50225294          | 9.040085684 | 1.978064 | 0.999969168       | -4.0023 |
| 10462359      | Gm9883    | predicted gene 9883                                                         | 0.501202613         | 7.397675513 | 1.396656 | 0.999969168       | -4.4787 |
| 10439989      |           |                                                                             | 0.500472902         | 7.165827683 | 3.545448 | 0.999969168       | -2.5558 |
| 10339609      |           |                                                                             | 0.499744875         | 6.624536279 | 1.414981 | 0.999969168       | -4.4651 |
| 10545569      | Reo3a     | regenerating islet-derived 3 gamma                                          | 0.498328147         | 5.782171027 | 3.032285 | 0.999969168       | -3.9236 |
| 10339883      |           |                                                                             | 0.493225668         | 5.013099864 | 1.815025 | 0.999969168       | -4.1442 |
| 10556206      | Snora3    | small nucleolar RNA, H                                                      | 0.490506716         | 9.16178618  | 2.197374 | 0.999969168       | -3.8045 |
| 10340144      |           |                                                                             | 0.490172369         | 6.907172396 | 1.601737 | 0.999969168       | -4.3709 |
| 10598081      |           |                                                                             | 0.487689795         | 8.24959142  | 1.32199  | 0.999969168       | -4.5326 |
| 10598057      |           |                                                                             | 0.485268812         | 9.719711418 | 1.7931   | 0.999969168       | -4.1629 |
| 10339978      |           |                                                                             | 0.481359955         | 6.256533745 | 1.545818 | 0.999969168       | -4.3652 |
| 10356137      | Tm4sf20   | transmembrane 4 L six family member 20                                      | 0.480701103         | 5.492442243 | 4.01254  | 0.999969168       | -2.1548 |
| 10570432      | Snora3    | small nucleolar RNA, H                                                      | 0.479829579         | 9.148168693 | 2.185197 | 0.999969168       | -3.8156 |
| 10343892      |           |                                                                             | 0.477772035         | 5.51722345  | 2.675272 | 0.999969168       | -3.3585 |
| 10338105      |           |                                                                             | 0.477430512         | 7.33837874  | 1.612173 | 0.999969168       | -4.3121 |
| 10340104      |           |                                                                             | 0.474956438         | 6.332304641 | 3.691543 | 0.999969168       | -2.4274 |
| 10432176      | Snora34   | small nucleolar RNA, H                                                      | 0.472283179         | 7.36627397  | 1.922255 | 0.999969168       | -4.0514 |
| 10449657      | Tfr3      | trefoil factor 3, intestinal                                                | 0.470680078         | 8.004363472 | 1.330541 | 0.999969168       | -4.5266 |
| 10339254      |           |                                                                             | 0.470228952         | 5.863563262 | 2.76898  | 0.999969168       | -3.2703 |
| 10343655      |           |                                                                             | 0.4695151082        | 6.666807629 | 3.295428 | 0.999969168       | -2.7808 |
| 10343266      |           |                                                                             | 0.467843667         | 5.25672997  | 4.196262 | 0.999969168       | -2.0051 |
| 10598091      |           |                                                                             | 0.466745275         | 6.567147938 | 4.144805 | 0.999969168       | -2.0466 |
| 10344322      |           |                                                                             | 0.464283668         | 7.62514813  | 2.172417 | 0.999969168       | -3.8273 |
| 10341206      |           |                                                                             | 0.462182714         | 5.497535703 | 2.124706 | 0.999969168       | -3.8708 |
| 10344299      |           |                                                                             | 0.460415119         | 6.722408782 | 1.434822 | 0.999969168       | -4.4503 |
| 10548752      |           |                                                                             | 0.45818154          | 7.53436082  | 1.866269 | 0.999969168       | -4.1002 |
| 10369171      | 9530009G  | RIKEN cDNA 9530009G21 gene                                                  | 0.456101453         | 6.990386684 | 2.927012 | 0.999969168       | -3.1219 |
| 10343210      |           |                                                                             | 0.452879894         | 5.066864187 | 1.510954 | 0.999969168       | -4.3924 |
| 10543017      | Pdk4      | pyruvate dehydrogenase kinase, isoenzyme 4                                  | 0.452187907         | 7.859204076 | 0.506362 | 0.999969168       | -4.9607 |
| 10563099      | Snord35b  | small nucleolar RNA, C                                                      | 0.451390245         | 8.27322472  | 2.385993 | 0.999969168       | -3.63   |
| 10339347      |           |                                                                             | 0.451005686         | 5.196490982 | 1.641621 | 0.999969168       | -4.2887 |
| 10344076      |           |                                                                             | 0.450156074         | 7.625434214 | 1.981939 | 0.999969168       | -3.9989 |
| 10351037      | Gae5      | growth arrest specific 5                                                    | 0.449910864         | 9.454284803 | 2.42438  | 0.999969168       | -3.5047 |
| 10338194      |           |                                                                             | 0.448070024         | 5.477784432 | 1.597043 | 0.999969168       | -4.3246 |
| 10343261      |           |                                                                             | 0.447681957         | 6.234271534 | 2.338367 | 0.999969168       | -3.6744 |
| 10376887      | Snord49a  | small nucleolar RNA, C                                                      | 0.446971681         | 7.130378846 | 1.950928 | 0.999969168       | -4.0262 |
| 10344206      |           |                                                                             | 0.438192984         | 6.215489883 | 2.280881 | 0.999969168       | -3.7276 |
| 10341254      |           |                                                                             | 0.434775435         | 5.723768147 | 2.398905 | 0.999969168       | -3.618  |
| 10351043      | Snord47   | small nucleolar RNA, C                                                      | 0.432597605         | 7.712836469 | 1.685363 | 0.999969168       | -4.253  |
| 10504178      | 4933409Kl | RIKEN cDNA 4933409Kl07 gene                                                 | 0.432084608         | 5.455950389 | 1.876751 | 0.999969168       | -4.0321 |
| 10583312      | Taf1d     | TATA box binding protein (Tbp)-associated factor, RNA polymerase I, D       | 0.42796853          | 7.888617393 | 1.499534 | 0.999969168       | -4.4012 |
| 10504148      | 4933409Kl | RIKEN cDNA 4933409Kl07 gene                                                 | 0.427858778         | 8.468051986 | 1.914945 | 0.999969168       | -4.0578 |
| 10339985      |           |                                                                             | 0.427775015         | 5.251524721 | 1.545064 | 0.999969168       | -4.3658 |
| 10507872      |           |                                                                             | 0.427579189         | 10.3249582  | 2.786198 | 0.999969168       | -3.2541 |
| 10353034      | Snord87   | small nucleolar RNA, C                                                      | 0.427482461         | 6.134938209 | 1.905912 | 0.999969168       | -4.0657 |
| 10339438      |           |                                                                             | 0.426854908         | 7.223207466 | 1.703131 | 0.999969168       | -4.2383 |
| 10344334      |           |                                                                             | 0.424981416         | 9.057713067 | 1.216116 | 0.999969168       | -4.6056 |
| 10476102      |           |                                                                             | 0.424007967         | 6.849323066 | 5.678449 | 0.999969168       | -0.9793 |
| 10507870      |           |                                                                             | 0.422559832         | 10.50590423 | 2.87744  | 0.999969168       | -3.1684 |
| 10339379      |           |                                                                             | 0.419108512         | 6.957330707 | 2.318777 | 0.999969168       | -3.6925 |
| 10344404      |           |                                                                             | 0.418217792         | 9.85382562  | 1.671968 | 0.999969168       | -2.264  |
| 10342142      |           |                                                                             | 0.41635455          | 4.848742147 | 2.294756 | 0.999969168       | -3.7148 |
| 10454731      |           |                                                                             | 0.415428328         | 7.199671864 | 1.69876  | 0.999969168       | -4.2419 |
| 10598083      |           |                                                                             | 0.414440427         | 7.578028008 | 1.65836  | 0.9999            |         |

|          |            |                                                                           |               |             |          |             |         |
|----------|------------|---------------------------------------------------------------------------|---------------|-------------|----------|-------------|---------|
| 10450482 |            |                                                                           | 0.410748355   | 9.520865965 | 3.412105 | 0.999969168 | -2.675  |
| 10360415 | Grem2      | oremlin 2 homolog. cysteine knot superfamily (Xenopus laevis)             | 0.408719183   | 8.333257634 | 1.510537 | 0.999969168 | -4.3927 |
| 10569962 | Ccl25      | chemokine (C-C motif) ligand 25                                           | 0.407553773   | 7.200188665 | 1.834857 | 0.999969168 | -4.1272 |
| 10344270 |            |                                                                           | 0.406855129   | 7.544290028 | 2.93733  | 0.999969168 | -3.1122 |
| 10343216 |            |                                                                           | 0.406802573   | 6.912795764 | 1.760846 | 0.999969168 | -4.1901 |
| 10409014 |            |                                                                           | 0.406554469   | 10.22362489 | 2.634524 | 0.999969168 | -3.3969 |
| 10342895 |            |                                                                           | 0.404111679   | 4.82553992  | 2.987153 | 0.999969168 | -3.0656 |
| 10538704 |            |                                                                           | 0.401003173   | 8.10644214  | 2.028898 | 0.999969168 | -3.9571 |
| 10343208 |            |                                                                           | 0.40005988    | 5.265680841 | 2.240365 | 0.999969168 | -3.745  |
| 10341359 |            |                                                                           | 0.398740268   | 5.142516429 | 1.485373 | 0.999969168 | -4.4171 |
| 10338672 |            |                                                                           | 0.395205987   | 7.139420958 | 2.299113 | 0.999969168 | -3.7108 |
| 10342060 |            |                                                                           | 0.393803967   | 8.39592362  | 1.257625 | 0.999969168 | -4.5775 |
| 10339713 |            |                                                                           | 0.393017952   | 5.165132871 | 2.159389 | 0.999969168 | -3.8392 |
| 10483679 |            |                                                                           | 0.3929380444  | 9.561773294 | 4.816594 | 0.999969168 | -1.5363 |
| 10343782 | Gor155     | G protein-coupled receptor 155                                            | 0.392878639   | 4.653366904 | 2.778887 | 0.999969168 | -1.3081 |
| 10526085 |            |                                                                           | 0.392596553   | 10.97359583 | 3.216534 | 0.999969168 | -2.853  |
| 10341097 |            |                                                                           | 0.392293573   | 7.572536491 | 1.598401 | 0.999969168 | -4.3236 |
| 10340763 |            |                                                                           | 0.391065169   | 5.727441909 | 2.811785 | 0.999969168 | -3.2301 |
| 10583310 | Taf1d      | TATA box binding protein (Tbp)-associated factor. RNA polymerase I. D     | 0.389336209   | 6.747213629 | 1.032869 | 0.999969168 | -4.7209 |
| 10343782 | Pim1       | nmviral integration site 1                                                | 0.388153437   | 10.09502772 | 1.924586 | 0.999969168 | -4.0494 |
| 10344184 |            |                                                                           | 0.387893832   | 6.330526639 | 1.582626 | 0.999969168 | -4.3361 |
| 10576967 | 3930402G   | RIKEN cDNA 3930402G23 clone                                               | 0.387656434   | 6.373507637 | 2.383818 | 0.999969168 | -3.6321 |
| 10575873 | Osain1     | oxidative stress induced growth inhibitor 1                               | 0.387304605   | 10.08714395 | 1.046769 | 0.999969168 | -4.7126 |
| 10342957 |            |                                                                           | 0.387035183   | 7.369164286 | 1.741905 | 0.999969168 | -4.206  |
| 10338311 |            |                                                                           | 0.386972055   | 9.168963029 | 1.943698 | 0.999969168 | -4.0326 |
| 10342790 |            |                                                                           | 0.386794274   | 5.125742613 | 2.827633 | 0.999969168 | -3.2152 |
| 10346298 | Coa10b     | coenzyme O10 homolog B (S. cerevisiae)                                    | 0.386633256   | 9.484448515 | 0.726344 | 0.999969168 | -4.8784 |
| 10343246 |            |                                                                           | 0.386262703   | 5.257379123 | 1.619136 | 0.999969168 | -4.3069 |
| 10341231 |            |                                                                           | 0.385674369   | 4.778959632 | 1.995095 | 0.999969168 | -3.9872 |
| 10343474 |            |                                                                           | 0.384867496   | 8.447762731 | 3.151351 | 0.999969168 | -7.9111 |
| 10343556 |            |                                                                           | 0.384798828   | 4.598836181 | 2.789027 | 0.999969168 | -3.2515 |
| 10339123 |            |                                                                           | 0.382316095   | 5.929296588 | 1.420607 | 0.999969168 | -4.461  |
| 10376885 | Snord49b   | small nucleolar RNA. C                                                    | 0.381610665   | 11.10022988 | 1.628789 | 0.999969168 | -4.2991 |
| 10543067 | Asns       | asparagine synthetase                                                     | 0.381503353   | 5.539374639 | 1.347939 | 0.999969168 | -4.145  |
| 10338477 |            |                                                                           | 0.381290124   | 5.056251578 | 1.62078  | 0.999969168 | -4.3056 |
| 10343761 |            |                                                                           | 0.380394087   | 7.027193423 | 1.465715 | 0.999969168 | -4.427  |
| 10608693 |            |                                                                           | 0.380245137   | 7.797581965 | 1.650194 | 0.999969168 | -4.2818 |
| 10340502 |            |                                                                           | 0.379535582   | 10.97585786 | 1.218406 | 0.999969168 | -4.604  |
| 10414202 | Sftoa1     | surfactant associated protein A1                                          | 0.379292431   | 7.2039748   | 1.224181 | 0.999969168 | -4.6002 |
| 10339617 |            |                                                                           | 0.378902801   | 7.13276931  | 1.375758 | 0.999969168 | -4.53   |
| 10341059 |            |                                                                           | 0.378670278   | 5.85014252  | 1.026604 | 0.999969168 | -4.7245 |
| 10341591 |            |                                                                           | 0.378514273   | 5.280235877 | 1.116674 | 0.999969168 | -4.6699 |
| 10343508 |            |                                                                           | 0.377990008   | 4.766388829 | 1.640994 | 0.999969168 | -4.2892 |
| 10341327 |            |                                                                           | 0.377853806   | 6.036825762 | 1.803278 | 0.999969168 | -4.1542 |
| 10338571 |            |                                                                           | 0.377842824   | 6.851271146 | 2.623714 | 0.999969168 | -4.4071 |
| 10504123 | Gm3893     | predicted gene 3893                                                       | 0.376607534   | 8.467447995 | 1.750013 | 0.999969168 | -4.1992 |
| 10504125 | Gm3893     | predicted gene 3893                                                       | 0.376607534   | 8.467447995 | 1.750013 | 0.999969168 | -4.1992 |
| 10338734 |            |                                                                           | 0.376271772   | 6.207312365 | 2.897304 | 0.999969168 | -3.1497 |
| 10481711 |            |                                                                           | 0.376054144   | 6.061389971 | 0.819233 | 0.999969168 | -4.8357 |
| 10343295 | Sxbp1      | svntaxin binding protein 1                                                | 0.375884197   | 6.37321102  | 2.077671 | 0.999969168 | -9.1913 |
| 10344208 |            |                                                                           | 0.373975831   | 5.239089972 | 1.72341  | 0.999969168 | -4.2215 |
| 10424555 |            |                                                                           | 0.373691307   | 5.18363316  | 1.713504 | 0.999969168 | -4.2297 |
| 10343573 |            |                                                                           | 0.373478906   | 4.842845173 | 3.2341   | 0.999969168 | -3.6876 |
| 10339433 |            |                                                                           | 0.372670226   | 5.69520465  | 2.775479 | 0.999969168 | -3.5642 |
| 10490942 | Mir174a-2  | microRNA 174a-2                                                           | 0.372418037   | 5.834860681 | 2.550069 | 0.999969168 | -1.4764 |
| 10515396 | Btdb19     | BTB (POZ) domain containing 19                                            | 0.372093012   | 6.71488935  | 2.382917 | 0.999969168 | -3.6329 |
| 10366346 | Phlda1     | pleckstrin homology-like domain, family A, member 1                       | 0.369932386   | 10.27253346 | 0.983686 | 0.999969168 | -4.7493 |
| 10506269 | AK31       | adenylate kinase 3-like 1                                                 | 0.369430768   | 8.344599846 | 1.248889 | 0.999969168 | -4.5835 |
| 10461156 | Snho1      | small nucleolar RNA host gene (non-protein coding) 1                      | 0.369238842   | 6.08322003  | 1.601372 | 0.999969168 | -4.3212 |
| 10340400 |            |                                                                           | 0.368877116   | 5.80820552  | 1.27766  | 0.999969168 | -4.5978 |
| 10374223 | Irfb1      | insulin-like growth factor binding protein 1                              | 0.368577715   | 11.703553   | 1.330133 | 0.999969168 | -4.5268 |
| 10339050 |            |                                                                           | 0.36774068    | 4.648852356 | 2.541257 | 0.999969168 | -3.4846 |
| 10341891 |            |                                                                           | 0.366581911   | 6.816579611 | 1.453898 | 0.999969168 | -4.436  |
| 10584458 |            |                                                                           | 0.365318462   | 6.173578234 | 1.667322 | 0.999969168 | -4.2678 |
| 10580723 | Olfr920    | olfactory receptor 920                                                    | 0.364685211   | 11.20725802 | 3.577021 | 0.999969168 | -7.5278 |
| 10344155 |            |                                                                           | 0.364532729   | 4.975277967 | 1.873118 | 0.999969168 | -4.0942 |
| 10341430 |            |                                                                           | 0.363880863   | 4.472240889 | 2.818753 | 0.999969168 | -3.2235 |
| 10539179 | Rec3b      | regenerating islet-derived 3 beta                                         | 0.363386978   | 4.966516007 | 2.153062 | 0.999969168 | -3.845  |
| 10339761 |            |                                                                           | 0.361898466   | 4.465435438 | 1.811084 | 0.999969168 | -4.1476 |
| 10344589 |            |                                                                           | 0.361464849   | 7.949409477 | 1.401031 | 0.999969168 | -4.4755 |
| 10343238 |            |                                                                           | 0.361328965   | 5.223409199 | 1.936133 | 0.999969168 | -4.0393 |
| 10382328 | Sox9       | SRY-box containing gene 9                                                 | 0.360675432   | 8.810538163 | 1.531201 | 0.999969168 | -4.3766 |
| 10341694 |            |                                                                           | 0.360009661   | 7.211625628 | 1.393911 | 0.999969168 | -4.4807 |
| 10338341 |            |                                                                           | 0.35974465    | 5.966669178 | 1.287097 | 0.999969168 | -4.5571 |
| 10341419 |            |                                                                           | 0.359663511   | 4.055644974 | 1.694571 | 0.999969168 | -4.2454 |
| 10342638 |            |                                                                           | 0.359004646   | 4.341863285 | 1.978404 | 0.999969168 | -4.002  |
| 10342806 |            |                                                                           | 0.358706174   | 7.241723559 | 1.619984 | 0.999969168 | -4.3062 |
| 10339289 |            |                                                                           | 0.358121768   | 4.49961655  | 1.382656 | 0.999969168 | -4.4889 |
| 10340579 |            |                                                                           | 0.358072447   | 6.815406011 | 1.890178 | 0.999969168 | -4.0794 |
| 10343516 |            |                                                                           | 0.357998675   | 5.238766740 | 2.486607 | 0.999969168 | -5.5359 |
| 10344102 |            |                                                                           | 0.354339516   | 7.031651514 | 1.037203 | 0.999969168 | -4.7183 |
| 10359689 | Atp1b1     | ATPase. Na+                                                               | 0.354314791   | 10.13151952 | 1.616757 | 0.999969168 | -4.3088 |
| 10445741 |            |                                                                           | 0.354297243   | 6.955709179 | 2.269694 | 0.999969168 | -3.7773 |
| 10408848 |            |                                                                           | 0.353623929   | 3.70531121  | 2.303333 | 0.999969168 | -3.7069 |
| 10344002 |            |                                                                           | 0.353456174   | 6.148977210 | 1.669205 | 0.999969168 | -2.7662 |
| 10340267 |            |                                                                           | 0.352313514   | 5.814605359 | 1.832055 | 0.999969168 | -4.1296 |
| 10342068 |            |                                                                           | 0.351145075   | 5.573224224 | 1.72409  | 0.999969168 | -4.2209 |
| 10344523 |            |                                                                           | 0.350958571   | 4.660212375 | 1.222725 | 0.999969168 | -6.6011 |
| 10343650 |            |                                                                           | 0.350373      | 8.857134088 | 1.079869 | 0.999969168 | -4.6527 |
| 10343122 |            |                                                                           | 0.349320046   | 7.262721147 | 1.372998 | 0.999969168 | -4.496  |
| 10502949 |            |                                                                           | 0.348814504   | 11.23781141 | 3.705468 | 0.999969168 | -2.4153 |
| 10512327 | 4933409K1  | RIKEN cDNA 4933409K07 clone                                               | 0.348626292   | 8.040083532 | 1.835977 | 0.999969168 | -4.1263 |
| 10343200 |            |                                                                           | 0.348330613   | 5.69524512  | 2.125238 | 0.999969168 | -3.8703 |
| 10341907 |            |                                                                           | 0.348113275   | 5.458655681 | 2.563429 | 0.999969168 | -3.4638 |
| 10340338 |            |                                                                           | 0.347834714   | 4.06132709  | 2.014274 | 0.999969168 | -9.7901 |
| 10344099 |            |                                                                           | 0.34744356    | 4.916961123 | 1.449114 | 0.999969168 | -4.4396 |
| 10342963 |            |                                                                           | 0.346890128   | 6.364014484 | 1.455299 | 0.999969168 | -4.4349 |
| 10590267 | Snora62    | small nucleolar RNA. H                                                    | 0.346851975   | 6.566285308 | 1.823956 | 0.999969168 | -3.2186 |
| 10470318 |            |                                                                           | 0.346764606   | 6.623472606 | 1.280576 | 0.999969168 | -4.5617 |
| 10508719 | Snora16a   | small nucleolar RNA. H                                                    | 0.346204152   | 8.687102451 | 1.874735 | 0.999969168 | -4.0928 |
| 10342110 |            |                                                                           | 0.344809167   | 5.783134679 | 1.241847 | 0.999969168 | -4.5882 |
| 10495675 | F3         | coagulation factor III                                                    | 0.343930157   | 7.145061365 | 1.979185 | 0.999969168 | -4.0013 |
| 10342107 |            |                                                                           | 0.342423203   | 7.280220682 | 1.55504  | 0.999969168 | -4.358  |
| 10342351 |            |                                                                           | 0.342076848   | 5.641492237 | 2.037036 | 0.999969168 | -3.9498 |
| 10338979 |            |                                                                           | 0.341375887   | 9.023594389 | 1.490927 | 0.999969168 | -4.4078 |
| 10533991 | Gm7774     | predicted gene 7774                                                       | 0.341327915   | 6.832569366 | 2.251494 | 0.999969168 | -3.7548 |
| 10595626 |            |                                                                           | 0.341139931   | 8.640474729 | 1.54287  | 0.999969168 | -4.3675 |
| 10338157 |            |                                                                           | 0.3408667     | 4.787885294 | 1.285511 | 0.999969168 | -4.5583 |
| 10338998 |            |                                                                           | 0.340826506   | 7.366575675 | 1.526623 | 0.999969168 | -4.3802 |
| 10340026 |            |                                                                           | 0.339860993   | 5.97519367  | 1.375989 | 0.999969168 | -4.4938 |
| 10460177 | Mt15       | metallothionein-like 5, testis-specific (tesmin)                          | 0.339307452   | 6.02742421  | 4.669492 | 0.999969168 | -1.6423 |
| 10342576 |            |                                                                           | 0.338568015   | 8.567847584 | 1.793066 | 0.999969168 | -4.1629 |
| 10344041 |            |                                                                           | 0.337932016   | 5.1774986   | 1.471767 | 0.999969168 | -4.4224 |
| 10504121 | Gm3893     | predicted gene 3893                                                       | 0.337614101   | 6.154205836 | 1.684403 | 0.999969168 | -4.2538 |
| 10398011 | Serpinad4r | serine (or cysteine) peptidase inhibitor, clade A, member 4, pseudogene 1 | 0.337295656   | 12.0347677  | 0.705046 | 0.999969168 | -8.8876 |
| 10593913 | 1700017B1  | RIKEN cDNA 1700017B05 clone                                               | 0.336626908   | 7.90330451  | 1.972368 | 0.999969168 | -4.0073 |
| 10373334 | Hsd17b6    | hydroxysteroid (17-beta) dehydrogenase 6                                  | 0.335619023   | 12.32857939 | 1.557489 | 0.999969168 | -4.356  |
| 10489891 | B4oaat5    | UDP-Gal:beta-GlcNAc beta 1-4-galactosyltransferase, polypeptide 5         | 0.335479205   | 9.95507406  | 1.404944 | 0.999969168 | -4.4726 |
| 10513943 | Rasf       | RAS and EF hand domain containing                                         | 0.334484917   | 7.874630676 | 1.675132 | 0.999969168 | -4.2514 |
| 10339991 |            |                                                                           | 0.334464679   | 6.290131011 | 1.712941 | 0.999969168 | -2.7307 |
| 10584827 | Moz12      | mvelin protein zero-like 2                                                | 0.333347474</ |             |          |             |         |
